# Supplementary material for: Accelerated Evolution of the Regulatory Sequences of Brain Development in the Human Genome
Source: PubMed Central journal article supplement — Mol Cells. 2020 Apr 10;43(4):331–9. doi: 10.14348/molcells.2020.2282 (PMC7191052; doi:10.14348/molcells.2020.2282), 2020-04-10
Supplement: MolCe-43-331_Supple.pdf [file MolCe-43-331_Supple.pdf]

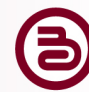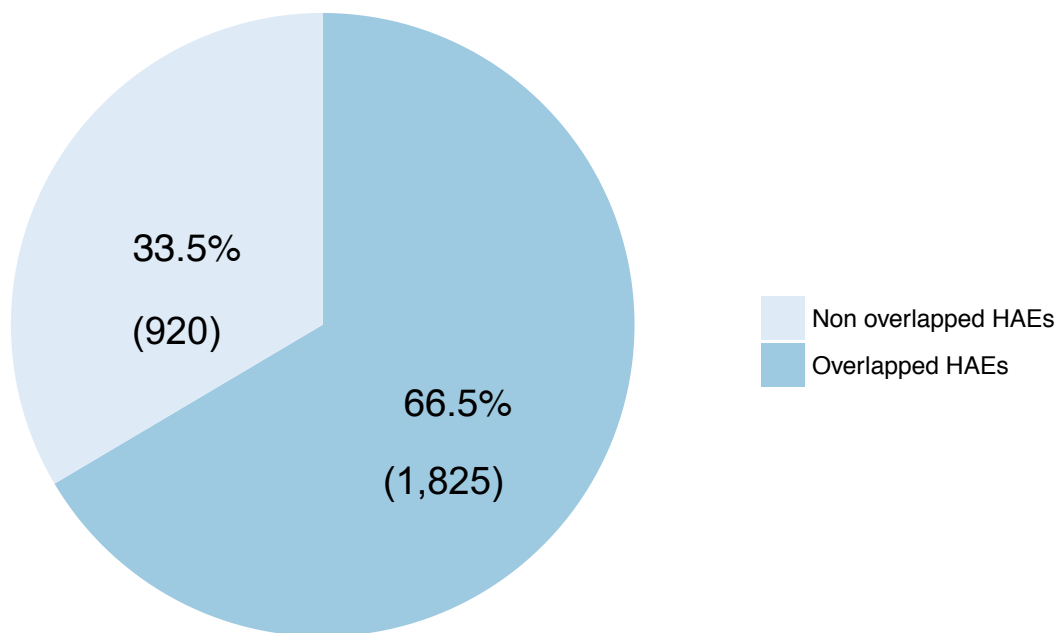

**Supplementary Fig. S1.** Pie chart showing the ratio of HAE overlaps with DHSs with many different origins.

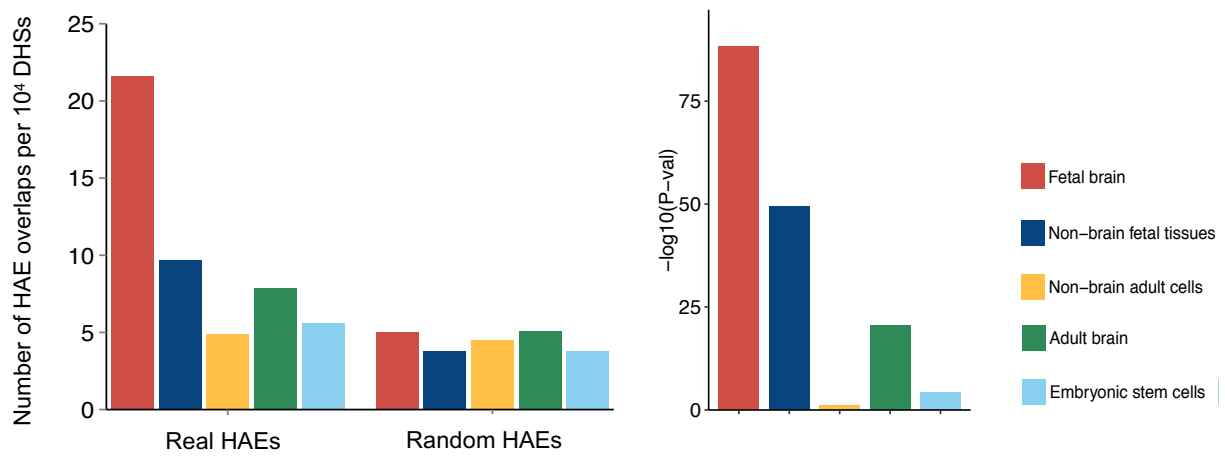

**Supplementary Fig. S2. The number of HAE overlaps per 10<sup>4</sup> DHSs combined according to cell- or tissue-origin.** The same number of DNA segments with the same size distribution as the HAEs was randomly captured from each chromosome to generate a false set of HAEs. The frequency of DHS overlapping was obtained repeatedly for a set of 1000 random HAEs in the same manner. Odds ratios (ORs) were obtained for each cell type using the Fisher's exact test (right bar plot).

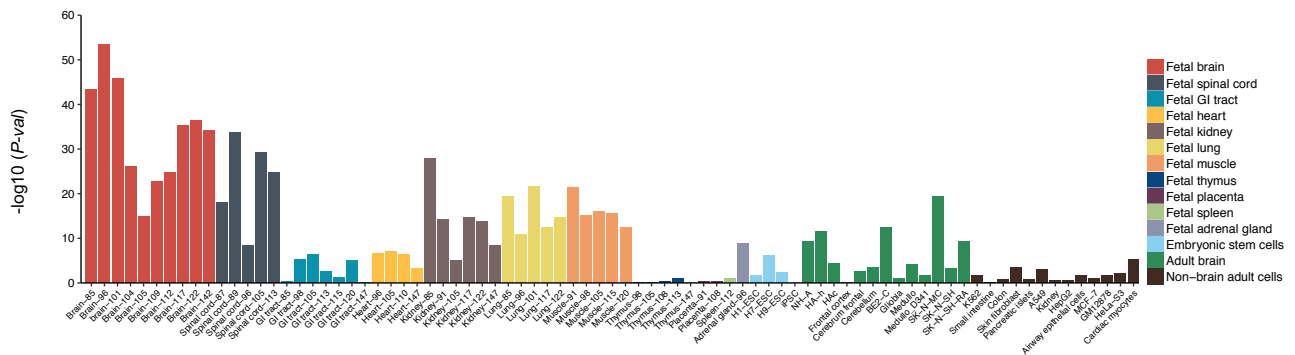

**Supplementary Fig. S3. Statistical enrichment test of HAE overlaps per 10<sup>4</sup> DHSs in each tissue or cell type.** The same number of DNA segments with the same size distribution as the DHSs was randomly captured from each chromosome to generate a false set of DHSs. The number of DHS overlaps was obtained repeatedly for a set of 1000 random DHSs. *P* values calculated with Fisher's exact test.

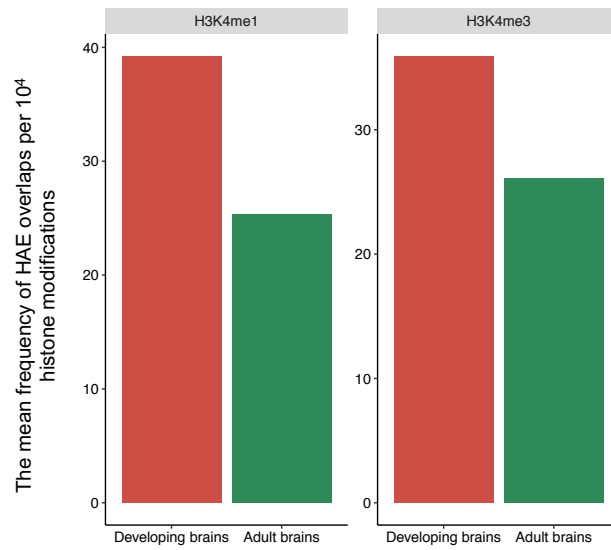

**Supplementary Fig. S4.** The mean frequency of the number of HAE overlaps per  $10^4$  peaks for each histone modification in developing brains (Fetal Brain, Germinal Matrix, Neurosphere Cultured Cells Ganglionic Eminence Derived, Neurosphere Cultured Cells Cortex Derived) and adult brains (Substantia Nigra, Mid Frontal Lobe, Inferior Temporal Lobe, Hippocampus Middle, Cingulate Gyrus, Anterior Caudate, Angular Gyrus).

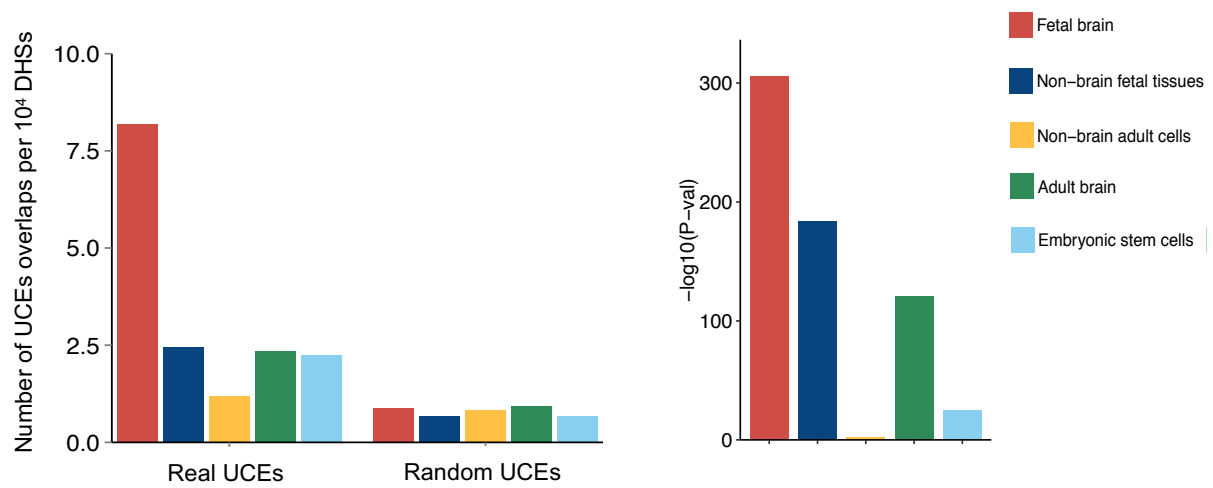

**Supplementary Fig. S5. The number of UCE overlaps per 10<sup>4</sup> DHSs combined according to cell- or tissue-origin.** The same number of DNA segments with the same size distribution as the UCEs was randomly captured from each chromosome to generate a false set of UCEs. The frequency of DHS overlapping was obtained repeatedly for a set of 1000 random UCEs in the same manner. Odds ratios (ORs) were obtained for each cell type using the Fisher's exact test (right bar plot).

**Supplementary Table S1.** The number of overlapped HAEs with DHSs

| Tissue types | Samples-age          | # of overlapped HAEs | # of total DHSs | Frequency |
|--------------|----------------------|----------------------|-----------------|-----------|
| Brain        | Fetal Brain-85       | 351                  | 152791          | 22.973    |
| Brain        | Fetal Brain-96       | 291                  | 153163          | 18.999    |
| Brain        | Fetal Brain-101      | 341                  | 181210          | 18.818    |
| Brain        | Fetal Brain-104      | 279                  | 185062          | 15.076    |
| Brain        | Fetal Brain-105      | 167                  | 39871           | 41.885    |
| Brain        | Fetal Brain-109      | 225                  | 142650          | 15.773    |
| Brain        | Fetal Brain-112      | 194                  | 97619           | 19.873    |
| Brain        | Fetal Brain-117      | 285                  | 158383          | 17.994    |
| Brain        | Fetal Brain-122      | 406                  | 239660          | 16.941    |
| Brain        | Fetal Brain-142      | 230                  | 101465          | 22.668    |
| Spinal cord  | Fetal Spinalcord-87  | 159                  | 42243           | 37.639    |
| Spinal cord  | Fetal Spinalcord-89  | 274                  | 147489          | 18.578    |
| Spinal cord  | Fetal Spinalcord-96  | 97                   | 35470           | 27.347    |
| Spinal cord  | Fetal Spinalcord-105 | 204                  | 107794          | 18.925    |
| Spinal cord  | Fetal Spinalcord-113 | 279                  | 194428          | 14.350    |
| GI           | Fetal GI-85          | 26                   | 54425           | 4.777     |
| GI           | Fetal GI-98          | 124                  | 203808          | 6.084     |
| GI           | Fetal GI-105         | 83                   | 120365          | 6.896     |
| GI           | Fetal GI-113         | 70                   | 125624          | 5.572     |
| GI           | Fetal GI-115         | 63                   | 94901           | 6.638     |
| GI           | Fetal GI-120         | 79                   | 143670          | 5.499     |
| GI           | Fetal GI-147         | 38                   | 112339          | 3.383     |
| Heart        | Fetal Heart-96       | 101                  | 127961          | 7.893     |
| Heart        | Fetal Heart-105      | 131                  | 204299          | 6.412     |
| Heart        | Fetal Heart-110      | 114                  | 135337          | 8.423     |
| Heart        | Fetal Heart-147      | 75                   | 91448           | 8.201     |
| Kidney       | Fetal Kidney-85      | 186                  | 104688          | 17.767    |
| Kidney       | Fetal Kidney-91      | 166                  | 110760          | 14.987    |
| Kidney       | Fetal Kidney-105     | 77                   | 71561           | 10.760    |
| Kidney       | Fetal Kidney-117     | 136                  | 96132           | 14.147    |
| Kidney       | Fetal Kidney-122     | 154                  | 118610          | 12.984    |
| Kidney       | Fetal Kidney-147     | 134                  | 93858           | 14.277    |
| Lung         | Fetal Lung-85        | 199                  | 162488          | 12.247    |
| Lung         | Fetal Lung-96        | 143                  | 114026          | 12.541    |
| Lung         | Fetal Lung-101       | 224                  | 187417          | 11.952    |
| Lung         | Fetal Lung-117       | 145                  | 116570          | 12.439    |
| Lung         | Fetal Lung-122       | 151                  | 125030          | 12.077    |
| Muscle       | Fetal Muscle-91      | 231                  | 238532          | 9.684     |
| Muscle       | Fetal Muscle-98      | 168                  | 136382          | 12.318    |
| Muscle       | Fetal Muscle-105     | 226                  | 221303          | 10.212    |
| Muscle       | Fetal Muscle-115     | 179                  | 124923          | 14.329    |
| Muscle       | Fetal Muscle-120     | 134                  | 142930          | 9.375     |
| Muscle       | Fetal Muscle-120     | 140                  | 146759          | 9.539     |
| Thymus       | Fetal Thymus-98      | 24                   | 70929           | 3.384     |
| Thymus       | Fetal Thymus-98      | 34                   | 121380          | 2.801     |
| Thymus       | Fetal Thymus-105     | 23                   | 82174           | 2.799     |
| Thymus       | Fetal Thymus-108     | 26                   | 63075           | 4.122     |
| Thymus       | Fetal Thymus-113     | 32                   | 61791           | 5.179     |
| Thymus       | Fetal Thymus-147     | 32                   | 67628           | 4.732     |
| Placenta     | Fetal Placenta-91    | 27                   | 135137          | 1.998     |
| Placenta     | Fetal Placenta-108   | 72                   | 186827          | 3.854     |
| Spleen       | Fetal Spleen-112     | 56                   | 128033          | 4.374     |
| Adrenal      | Fetal Adrenal-96     | 29                   | 47376           | 6.121     |
| ESC          | H1-ESC               | 116                  | 258188          | 4.493     |
| ESC          | H7-ESC               | 174                  | 266731          | 6.523     |
| ESC          | H9-ESC               | 98                   | 163824          | 5.982     |
| ESC          | iPS                  | 83                   | 203810          | 4.072     |

Supplementary Table S1. Continued

| Tissue types | Samples-age             | # of overlapped HAEs | # of total DHSs | Frequency |
|--------------|-------------------------|----------------------|-----------------|-----------|
| adultBrain   | NH-A                    | 287                  | 429788          | 6.678     |
| adultBrain   | HA-h                    | 215                  | 240585          | 8.937     |
| adultBrain   | HAc                     | 171                  | 196507          | 8.702     |
| adultBrain   | Frontal_cortex_OC       | 211                  | 378445          | 5.575     |
| adultBrain   | Cerebrum_frontal_OC     | 141                  | 135930          | 10.373    |
| adultBrain   | Cerebellum_OC           | 131                  | 104575          | 12.527    |
| adultBrain   | BE2-C                   | 189                  | 205874          | 9.180     |
| adultBrain   | Gliobla                 | 202                  | 305860          | 6.604     |
| adultBrain   | Medullo                 | 356                  | 553183          | 6.435     |
| adultBrain   | Medullo_D341            | 149                  | 154728          | 9.630     |
| adultBrain   | SK-N-MC                 | 230                  | 187226          | 12.285    |
| adultBrain   | SK-N-SH                 | 117                  | 101878          | 11.484    |
| adultBrain   | SK-N-SH-RA              | 136                  | 133705          | 10.172    |
| otherTissue  | K562                    | 118                  | 247441          | 4.769     |
| otherTissue  | Small intestine         | 73                   | 213646          | 3.417     |
| otherTissue  | Colon                   | 86                   | 258813          | 3.323     |
| otherTissue  | Skin fibroblast         | 182                  | 352169          | 5.168     |
| otherTissue  | Pancreatic islets       | 253                  | 536270          | 4.718     |
| otherTissue  | A549                    | 216                  | 391213          | 5.521     |
| otherTissue  | Kidney                  | 100                  | 287593          | 3.477     |
| otherTissue  | HepG2                   | 118                  | 306113          | 3.855     |
| otherTissue  | Airway epithelial cells | 110                  | 216251          | 5.087     |
| otherTissue  | MCF-7                   | 101                  | 256802          | 3.933     |
| otherTissue  | GM12878                 | 125                  | 365758          | 3.418     |
| otherTissue  | HeLa-S3                 | 265                  | 736240          | 3.599     |
| otherTissue  | Cardiac myocytes        | 139                  | 211215          | 6.581     |

**Supplementary Table S2.** The number of overlapped HAEs with histone modification

| Brain samples          | Histone modification | # of overlapped HAEs | # of total histone modification peaks | Frequency |
|------------------------|----------------------|----------------------|---------------------------------------|-----------|
| Fetal Brain            | H3K36me3             | 102                  | 109760                                | 9.293     |
| Fetal Brain            | H3K9me3              | 74                   | 135757                                | 5.451     |
| Fetal Brain            | H3K9ac               | 150                  | 85497                                 | 17.544    |
| Fetal Brain            | H3K4me1              | 614                  | 159004                                | 38.615    |
| Fetal Brain            | H3K4me3              | 241                  | 73998                                 | 32.568    |
| Fetal Brain            | H3K27me3             | 351                  | 141989                                | 24.720    |
| Germinal Matrix        | H3K4me3              | 158                  | 39603                                 | 39.896    |
| Germinal Matrix        | H3K4me1              | 541                  | 122055                                | 44.324    |
| Germinal Matrix        | H3K36me3             | 90                   | 80739                                 | 11.147    |
| Germinal Matrix        | H3K9me3              | 46                   | 119569                                | 3.847     |
| Germinal Matrix        | H3K27me3             | 107                  | 57782                                 | 18.518    |
| Angular Gyrus          | H3K4me3              | 164                  | 64376                                 | 25.475    |
| Angular Gyrus          | H3K9ac               | 170                  | 85551                                 | 19.871    |
| Angular Gyrus          | H3K27ac              | 228                  | 101995                                | 22.354    |
| Angular Gyrus          | H3K27me3             | 148                  | 84101                                 | 17.598    |
| Angular Gyrus          | H3K4me1              | 419                  | 168360                                | 24.887    |
| Angular Gyrus          | H3K9me3              | 29                   | 92184                                 | 3.146     |
| Angular Gyrus          | H3K36me3             | 94                   | 113191                                | 8.305     |
| Anterior Caudate       | H3K4me3              | 227                  | 76598                                 | 29.635    |
| Anterior Caudate       | H3K9ac               | 198                  | 83179                                 | 23.804    |
| Anterior Caudate       | H3K36me3             | 121                  | 115010                                | 10.521    |
| Anterior Caudate       | H3K27me3             | 230                  | 143092                                | 16.074    |
| Anterior Caudate       | H3K27ac              | 262                  | 104015                                | 25.189    |
| Anterior Caudate       | H3K9me3              | 49                   | 117729                                | 4.162     |
| Anterior Caudate       | H3K4me1              | 539                  | 184995                                | 29.136    |
| Cingulate Gyrus        | H3K9me3              | 14                   | 64210                                 | 2.180     |
| Cingulate Gyrus        | H3K4me1              | 360                  | 142789                                | 25.212    |
| Cingulate Gyrus        | H3K36me3             | 73                   | 95251                                 | 7.664     |
| Cingulate Gyrus        | H3K4me3              | 141                  | 53636                                 | 26.288    |
| Cingulate Gyrus        | H3K9ac               | 180                  | 94068                                 | 19.135    |
| Hippocampus Middle     | H3K4me1              | 361                  | 158979                                | 22.707    |
| Hippocampus Middle     | H3K27me3             | 99                   | 83209                                 | 11.898    |
| Hippocampus Middle     | H3K9me3              | 28                   | 95512                                 | 2.932     |
| Hippocampus Middle     | H3K27ac              | 195                  | 100386                                | 19.425    |
| Hippocampus Middle     | H3K4me3              | 157                  | 70559                                 | 22.251    |
| Hippocampus Middle     | H3K36me3             | 97                   | 112467                                | 8.625     |
| Hippocampus Middle     | H3K9ac               | 169                  | 87502                                 | 19.314    |
| Inferior Temporal Lobe | H3K9me3              | 44                   | 105153                                | 4.184     |
| Inferior Temporal Lobe | H3K4me1              | 442                  | 168512                                | 26.230    |
| Inferior Temporal Lobe | H3K36me3             | 96                   | 110987                                | 8.650     |
| Inferior Temporal Lobe | H3K27me3             | 190                  | 118260                                | 16.066    |
| Inferior Temporal Lobe | H3K4me3              | 177                  | 64338                                 | 27.511    |
| Inferior Temporal Lobe | H3K9ac               | 163                  | 85887                                 | 18.978    |
| Inferior Temporal Lobe | H3K27ac              | 266                  | 116235                                | 22.885    |
| Mid Frontal Lobe       | H3K27me3             | 146                  | 92100                                 | 15.852    |
| Mid Frontal Lobe       | H3K36me3             | 108                  | 117568                                | 9.186     |
| Mid Frontal Lobe       | H3K4me1              | 301                  | 136627                                | 22.031    |
| Mid Frontal Lobe       | H3K9me3              | 48                   | 101071                                | 4.749     |
| Mid Frontal Lobe       | H3K9ac               | 159                  | 85503                                 | 18.596    |
| Mid Frontal Lobe       | H3K4me3              | 140                  | 49379                                 | 28.352    |
| Substantia Nigra       | H3K27me3             | 177                  | 110201                                | 16.062    |
| Substantia Nigra       | H3K4me1              | 428                  | 157185                                | 27.229    |
| Substantia Nigra       | H3K9ac               | 185                  | 86825                                 | 21.307    |
| Substantia Nigra       | H3K9me3              | 28                   | 97993                                 | 2.857     |
| Substantia Nigra       | H3K4me3              | 188                  | 80665                                 | 23.306    |
| Substantia Nigra       | H3K36me3             | 79                   | 87945                                 | 8.983     |



Supplementary Table S2. Continued

| Brain samples                                          | Histone modification | # of overlapped HAEs | # of total histone modification peaks | Frequency |
|--------------------------------------------------------|----------------------|----------------------|---------------------------------------|-----------|
| Neurosphere Cultured Cells Cortex Derived              | H3K27me3             | 224                  | 103669                                | 21.607    |
| Neurosphere Cultured Cells Cortex Derived              | H3K9me3              | 39                   | 99535                                 | 3.918     |
| Neurosphere Cultured Cells Cortex Derived              | H3K4me1              | 528                  | 136068                                | 38.804    |
| Neurosphere Cultured Cells Cortex Derived              | H3K4me3              | 89                   | 26970                                 | 33.000    |
| Neurosphere Cultured Cells Cortex Derived              | H3K36me3             | 122                  | 87986                                 | 13.866    |
| Neurosphere Cultured Cells Ganglionic Eminence Derived | H3K4me1              | 495                  | 140860                                | 35.141    |
| Neurosphere Cultured Cells Ganglionic Eminence Derived | H3K4me3              | 149                  | 39010                                 | 38.195    |
| Neurosphere Cultured Cells Ganglionic Eminence Derived | H3K36me3             | 104                  | 84256                                 | 12.343    |
| Neurosphere Cultured Cells Ganglionic Eminence Derived | H3K27me3             | 119                  | 81200                                 | 14.655    |
| Neurosphere Cultured Cells Ganglionic Eminence Derived | H3K9me3              | 42                   | 112571                                | 3.731     |
